# Supplementary material for: Patterns of Gene Flow between Crop and Wild Carrot, Daucus carota (Apiaceae) in the United States
Source: PLoS One. 2016 Sep 7;11(9):e0161971. doi: 10.1371/journal.pone.0161971 (PMC5014312; doi:10.1371/journal.pone.0161971)
Supplement: S1 Table — (XLSX) [file pone.0161971.s005.xlsx]

## Sheet: S1Table
GSSR	MgCl2	10X Buffer	dNTPs @ 20 mM	M13 @ 10 µM	F @ 5 µM	R @ 20 µM	TAQ	Program
3	0.35 µl	1.5 µl	0.2 µl	0.2 µl	0.2 µl	0.2 µl	0.5 (1:3) µl	TD 57_45
4	0.35 µl	1.5 µl	0.2 µl	0.2 µl	0.2 µl	0.2 µl	0.5 (1:3) µl	TD 57_45
6	0.35 µl	1.5 µl	0.2 µl	0.2 µl	0.2 µl	0.2 µl	0.5 (conc) µl	TD 57_45
7	0.35 µl	1.5 µl	0.2 µl	0.2 µl	0.2 µl	0.2 µl	0.5 (1:3) µl	TD 57_45
9	0.35 µl	1.5 µl	0.2 µl	0.2 µl	0.2 µl	0.2 µl	0.5 (1:3) µl	TD 57_45
11	0.35 µl	1.5 µl	0.2 µl	0.2 µl	0.2 µl	0.2 µl	0.5 (conc) µl	TD 50_45
16	0.35 µl	1.5 µl	0.2 µl	0.2 µl	0.2 µl	0.2 µl	0.5 (1:3) µl	TD 57_45
24	0.35 µl	1.5 µl	0.2 µl	0.2 µl	0.2 µl	0.2 µl	0.5 (1:3) µl	TD 57_45
31	0.35 µl	1.5 µl	0.2 µl	0.2 µl	0.2 µl	0.2 µl	0.5 (1:3) µl	TD 54_45
35	0.35 µl	1.5 µl	0.2 µl	0.2 µl	0.2 µl	0.2 µl	0.5 (1:3) µl	TD 57_45
57	0.35 µl	1.5 µl	0.2 µl	0.2 µl	0.2 µl	0.2 µl	0.5 (conc) µl	TD 50_45
65	0.35 µl	1.5 µl	0.2 µl	0.2 µl	0.2 µl	0.2 µl	0.5 (1:3) µl	TD 57_45
85	0.35 µl	1.5 µl	0.2 µl	0.2 µl	0.2 µl	0.2 µl	0.5 (1:3) µl	TD 57_45
107	0.35 µl	1.5 µl	0.2 µl	0.2 µl	0.2 µl	0.2 µl	0.5 (1:3) µl	TD 57_45
111	0.35 µl	1.5 µl	0.2 µl	0.2 µl	0.2 µl	0.2 µl	0.5 (conc) µl	TD 57_45
StoG	0.35 µl	1.5 µl	0.2 µl	0.2 µl	0.2 µl	0.2 µl	0.5 (1:3) µl	TD 57_45
